# Supplementary material
Source: ML conference proceedings conference paper supplement (https://openreview.net/forum?id=Bhz4TPUo9g5)
Supplement: supplementary_material [file attachment]

Smoother  
↓

Label Lipschitzness

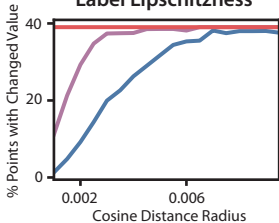

Coverage Lipschitzness

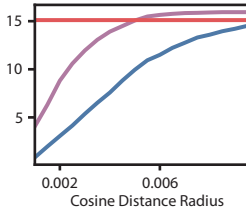

Local Label PL

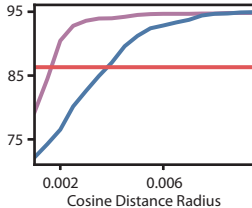

— No Prompt

— Prompt at Beginning

— Prompt at End
