# Supplementary material
Source: ML conference proceedings conference paper supplement (https://openreview.net/forum?id=Bhz4TPUo9g5)

# Spouse Lipschitzness

Smother  
↓

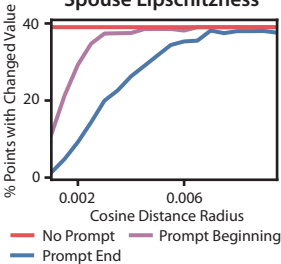

Supplement: supplementary_material [file attachment]

Vary LF Accuracy

Vary Smoothness

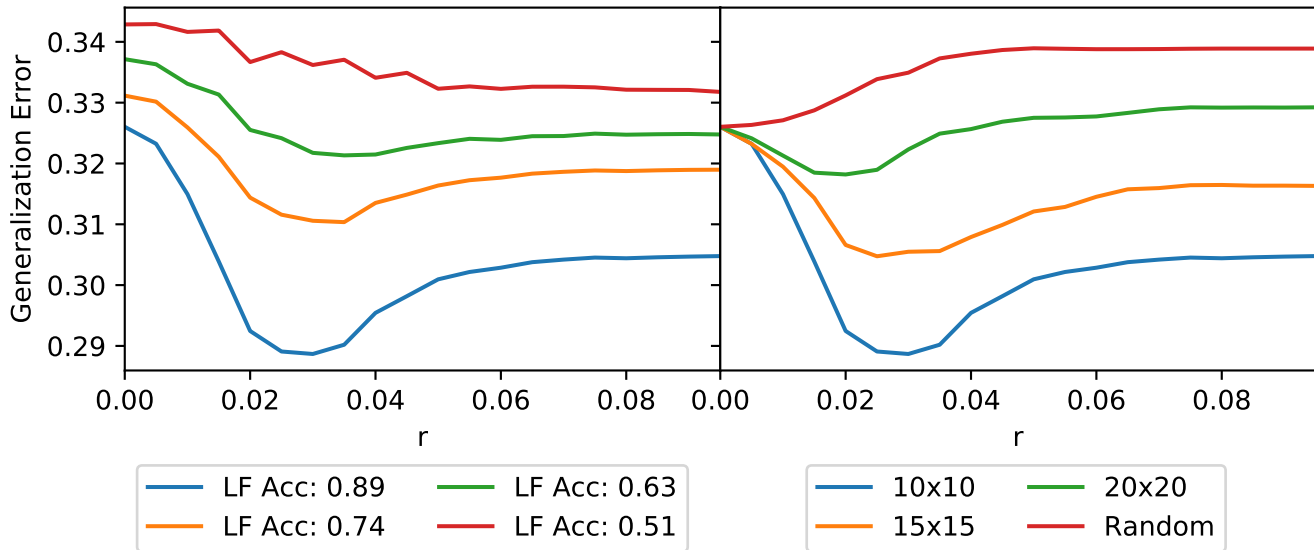

Supplement: supplementary_material [file attachment]

# Basketball Lipschitzness

Smoother  
↓

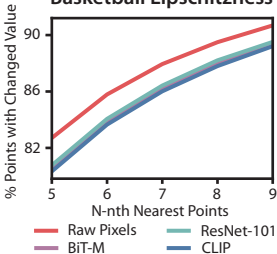

Supplement: supplementary_material [file attachment]

Bias-variance tradeoff depending on number of partitions

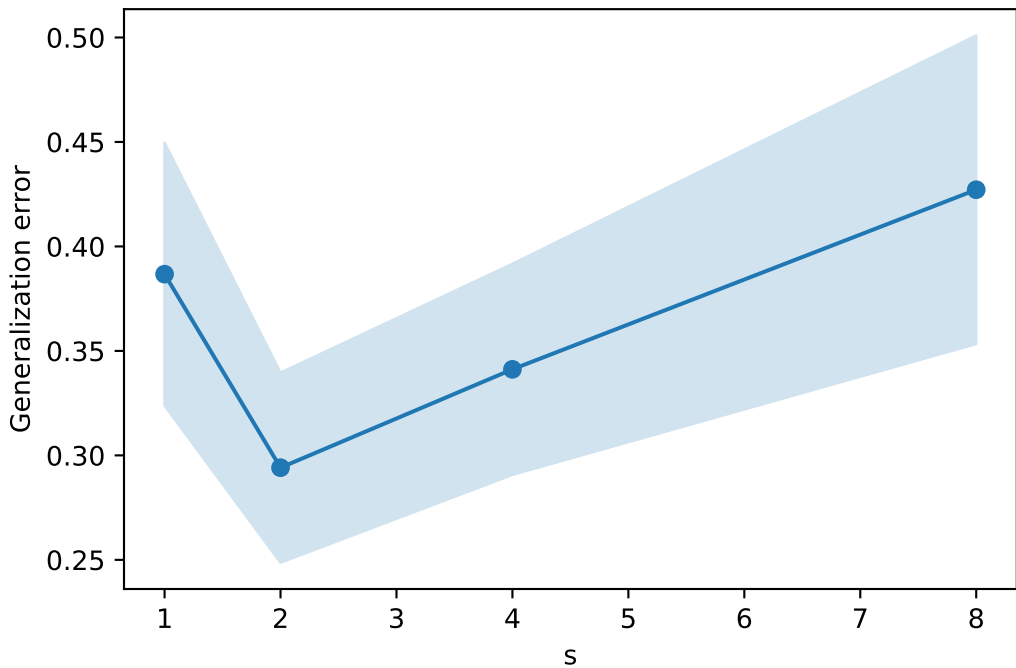

Supplement: supplementary_material [file attachment]

# Liger: Smart Fusion of Foundation Models and Weak Supervision

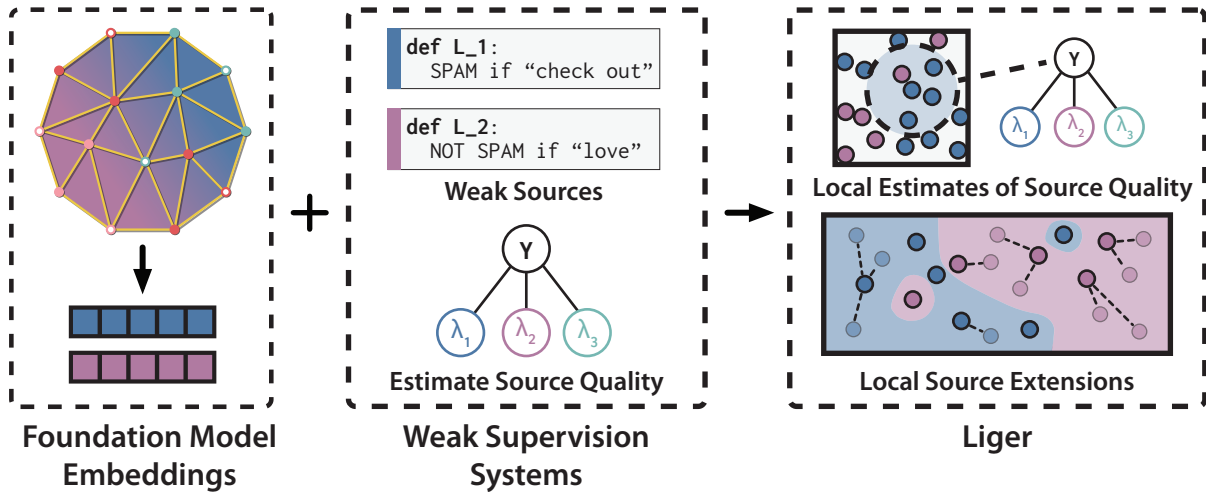

Supplement: supplementary_material [file attachment]
